# Supplementary material
Source: PubMed Central journal article supplement (PMC6989796)
Supplement: JB.00418-19-s0001.pdf [file JB.00418-19-s0001.pdf]

## Supplemental Material

### Table S1 Strains and plasmids used

| Strain or plasmid                                                        | Relevant characteristic(s)                                                                             | Reference |
|--------------------------------------------------------------------------|--------------------------------------------------------------------------------------------------------|-----------|
| Strains                                                                  |                                                                                                        |           |
| <i>Pst</i> DC3000                                                        | <i>Pseudomonas syringae</i> pv. <i>tomato</i><br>DC3000, wild type                                     | (1)       |
| <i>Pst</i> DC3000 $\Delta$ <i>algU</i>                                   | $\Delta$ <i>algU</i>                                                                                   | (2)       |
| <i>Pst</i> DC3000 $\Delta$ <i>algUmucAB</i>                              | $\Delta$ <i>algUmucAB</i>                                                                              | (2)       |
| <i>Pst</i> DC3000 D36E                                                   | <i>Pst</i> DC3000 with all 36 known virulence<br>effector genes deleted                                | (3)       |
| <i>Pst</i> DC3000 D36E $\Delta$ <i>fliC</i>                              | Effector polymutant with <i>fliC</i> deleted                                                           | (4)       |
| <i>Pst</i> DC3000 D36E<br>$\Delta$ <i>algUmucAB</i>                      | Effector polymutant with <i>algUmucAB</i><br>deleted                                                   | This work |
| <i>Pst</i> DC3000 D36E<br>$\Delta$ <i>algUmucAB</i> $\Delta$ <i>fliC</i> | Effector polymutant with <i>algUmucAB</i> and<br><i>fliC</i> deleted                                   | This work |
| <i>Agrobacterium</i><br><i>tumefaciens</i> GV2260                        | VIGS vector delivery strain                                                                            | (5)       |
| <i>Pst</i> DC3000 $\Delta$ <i>hopQ1-1</i>                                | <i>hopQ1-1</i> effector gene deletion renders <i>Pst</i><br>DC3000 pathogenic on <i>N. benthamiana</i> | (6)       |
| <i>Pst</i> DC3000 $\Delta$ <i>hopQ1-1</i><br>$\Delta$ <i>fliC</i>        | $\Delta$ <i>hopQ1-1</i> $\Delta$ <i>fliC</i>                                                           | (6)       |
| <i>Pst</i> DC3000 $\Delta$ <i>hopQ1-1</i><br>$\Delta$ <i>algUmucAB</i>   | $\Delta$ <i>hopQ1-1</i> $\Delta$ <i>algUmucAB</i>                                                      | This work |

|                                                 |                                                                                         |           |
|-------------------------------------------------|-----------------------------------------------------------------------------------------|-----------|
| <i>Pst</i> DC3000 $\Delta$ hopQ1-1              | $\Delta$ hopQ1-1 $\Delta$ algUmucAB $\Delta$ fliC                                       | This work |
| $\Delta$ algUmucAB $\Delta$ fliC                |                                                                                         |           |
| <i>Pst</i> DC3000 $\Delta$ hrcQ-U               | Non-pathogenic, Type three secretion system deficient <i>Pst</i> DC3000                 | (7)       |
| <i>Pst</i> DC3000 $\Delta$ hrcQ-U $\Delta$ fliC | $\Delta$ hrcQ-U $\Delta$ fliC                                                           | (8)       |
| <i>Pst</i> DC3000 $\Delta$ hrcQ-U               | $\Delta$ hrcQ-U $\Delta$ algUmucAB                                                      | This work |
| $\Delta$ algUmucAB                              |                                                                                         |           |
| <i>Pst</i> DC3000 $\Delta$ hrcQ-U               | $\Delta$ hrcQ-U $\Delta$ algUmucAB $\Delta$ fliC                                        | This work |
| $\Delta$ algUmucAB $\Delta$ fliC                |                                                                                         |           |
| <i>Pst</i> DC3000 $\Delta$ hopQ1-1              | $\Delta$ avrPto $\Delta$ avrPtoB mutants are unable to suppress flagellin activated PTI | (6)       |
| $\Delta$ avrPto $\Delta$ avrPtoB                |                                                                                         |           |
| <i>Pst</i> DC3000 $\Delta$ hopQ1-1              | $\Delta$ hopQ1-1 $\Delta$ avrPto $\Delta$ avrPtoB $\Delta$ fliC                         | (6)       |
| $\Delta$ avrPto $\Delta$ avrPtoB $\Delta$ fliC  |                                                                                         |           |
| <i>Pst</i> DC3000 $\Delta$ hopQ1-1              | $\Delta$ hopQ1-1 $\Delta$ avrPto $\Delta$ avrPtoB $\Delta$ algUmucAB                    | This work |
| $\Delta$ avrPto $\Delta$ avrPtoB                |                                                                                         |           |
| $\Delta$ algUmucAB                              |                                                                                         |           |
| <i>Pst</i> DC3000 $\Delta$ hopQ1-1              | $\Delta$ hopQ1-1 $\Delta$ avrPto $\Delta$ avrPtoB $\Delta$ algUmucAB                    | This work |
| $\Delta$ avrPto $\Delta$ avrPtoB                | $\Delta$ fliC                                                                           |           |
| $\Delta$ algUmucAB $\Delta$ fliC                |                                                                                         |           |
| Plasmids                                        |                                                                                         |           |
| pJN105                                          | P <sub>BAD</sub> ::empty; Gm <sup>r</sup>                                               | (9)       |
| pEM53                                           | P <sub>BAD</sub> ::algU; Gm <sup>r</sup>                                                | (9)       |
| pTRV1                                           | VIGS destination vector                                                                 | (5)       |
| pQ11-EC1                                        | VIGS control vector                                                                     | (5)       |

|                      |                                                                 |      |
|----------------------|-----------------------------------------------------------------|------|
| pTRV2-FLS2           | FLS2 silencing construct                                        | (5)  |
| pZB28                | pK18mobsacB/ $\Delta$ <i>algUmucAB</i>                          | (2)  |
| pME6010- <i>fliC</i> | <i>fliC</i> expressed from its native promoter; Tc <sup>r</sup> | (10) |

**Table S2. Oligonucleotide primers used in qRT-PCR**

| No.  | Sequence               | Description                    |
|------|------------------------|--------------------------------|
| 381  | CCGCAAGGTGATTATCTCAGC  | <i>gap-1</i> Fwd               |
| 382  | TGGAGATGATCTGGTGCGACT  | <i>gap-1</i> Rev               |
| 6868 | CCAGACAATGGCGATCAA     | PSPTO_1949 ( <i>fliC</i> ) Fwd |
| 6869 | TACGCTGCAGAATGTTGG     | PSPTO_1949 ( <i>fliC</i> ) Rev |
| 6980 | GAACATGCCGAACATGGA     | PSPTO_915 Fwd                  |
| 6981 | CGATTCCTGAGACTCGGT     | PSPTO_915 Rev                  |
| 6982 | AAATCACGGACAAGCTGAC    | PSPTO_1925 Fwd                 |
| 6983 | ACACGGTTGCTGTCTACTA    | PSPTO_1925 Rev                 |
| 6984 | AACAGCCGCCATATCGAA     | PSPTO_1933 Fwd                 |
| 6985 | AGTCAACGGTGTTCTGGT     | PSPTO_1933 Rev                 |
| 6986 | CGCTAAAGATCACGAGGTTG   | PSPTO_1979 Fwd                 |
| 6987 | AGGTCGTCGAAACTGAAGA    | PSPTO_1979 Rev                 |
| 6988 | CTTCCTGTACTGATGGTTACTG | PSPTO_1980 Fwd                 |
| 6989 | CCGTGAATGGCTTGACTAC    | PSPTO_1980 Rev                 |
| 6990 | TATCGAAACGCCGAAGA      | PSPTO_1982 Fwd                 |
| 6991 | GGAAATCGACAGCAGGATATG  | PSPTO_1982 Rev                 |
| 6992 | ATCCGAACGAGATCAAATGG   | PSPTO_1987 Fwd                 |
| 6993 | CTCTGCAACATCCAGCAA     | PSPTO_1987 Rev                 |

|      |                     |                |
|------|---------------------|----------------|
| 6994 | GGTTTACTTGCGTCAGTCC | PSPTO_1988 Fwd |
| 6995 | CAGTTCGCCGTTCTTGTT  | PSPTO_1988 Rev |

---

## References

1. Buell CR, Joardar V, Lindeberg M, Selengut J, Paulsen IT, Gwinn ML, Dodson RJ, Deboy RT, Durkin AS, Kolonay JF, Madupu R, Daugherty S, Brinkac L, Beanan MJ, Haft DH, Nelson WC, Davidsen T, Zafar N, Zhou LW, Liu J, Yuan QP, Khouri H, Fedorova N, Tran B, Russell D, Berry K, Utterback T, Van Aken SE, Feldblyum TV, D'Ascenzo M, Deng WL, Ramos AR, Alfano JR, Cartinhour S, Chatterjee AK, Delaney TP, Lazarowitz SG, Martin GB, Schneider DJ, Tang XY, Bender CL, White O, Fraser CM, Collmer A. 2003. The complete genome sequence of the Arabidopsis and tomato pathogen *Pseudomonas syringae* pv. tomato DC3000. *Proceedings of the National Academy of Sciences of the United States of America* 100:10181-10186.
2. Markel E, Stodghill P, Bao Z, Myers CR, Swingle B. 2016. AlgU controls expression of virulence genes in *Pseudomonas syringae* pv. tomato DC3000. *J Bacteriol* 198:2330-2344.
3. Wei HL, Chakravarthy S, Mathieu J, Helmann TC, Stodghill P, Swingle B, Martin GB, Collmer A. 2015. *Pseudomonas syringae* pv. tomato DC3000 Type III Secretion Effector Polymutants Reveal an Interplay between HopAD1 and AvrPtoB. *Cell Host Microbe* 17:752-762.
4. Wei HL, Zhang W, Collmer A. 2018. Modular Study of the Type III Effector Repertoire in *Pseudomonas syringae* pv. tomato DC3000 Reveals a Matrix of Effector Interplay in Pathogenesis. *Cell Rep* 23:1630-1638.

5. Rosli HG, Zheng Y, Pombo MA, Zhong S, Bombarely A, Fei Z, Collmer A, Martin GB. 2013. Transcriptomics-based screen for genes induced by flagellin and repressed by pathogen effectors identifies a cell wall-associated kinase involved in plant immunity. *Genome Biol* 14:R139.
6. Kvitko BH, Park DH, Velasquez AC, Wei CF, Russell AB, Martin GB, Schneider DJ, Collmer A. 2009. Deletions in the repertoire of *Pseudomonas syringae* pv. tomato DC3000 type III secretion effector genes reveal functional overlap among effectors. *PLoS Pathog* 5:e1000388.
7. Badel JL, Shimizu R, Oh HS, Collmer A. 2006. A *Pseudomonas syringae* pv. tomato avrE1/hopM1 mutant is severely reduced in growth and lesion formation in tomato. *Mol Plant Microbe Interact* 19:99-111.
8. Wei H-I, Chakravarthy S, Worley JN, Collmer A. 2013. Consequences of flagellin export through the type III secretion system of *Pseudomonas syringae* reveal a major difference in the innate immune systems of mammals and the model plant *Nicotiana benthamiana*. *Cellular microbiology* 15:601-618.
9. Clarke CR, Hayes BW, Runde BJ, Markel E, Swingle BM, Vinatzer BA. 2016. Comparative genomics of *Pseudomonas syringae* pathovar tomato reveals novel chemotaxis pathways associated with motility and plant pathogenicity. *PeerJ* 4:e2570.
10. Clarke CR, Chinchilla D, Hind SR, Taguchi F, Miki R, Ichinose Y, Martin GB, Leman S, Felix G, Vinatzer BA. 2013. Allelic variation in two distinct *Pseudomonas syringae* flagellin epitopes modulates the strength of plant immune responses but not bacterial motility. *New Phytologist* 200:847-860.
